# Supplementary material
Source: Springer Nature journal article supplement (https://www.springermedizin.de/resource/supplementary/12913_2012_2415_MOESM4_ESM.pdf/9530468)

# Thyolo-Malawi

## A Probability of *LFU* while on ART – 0m

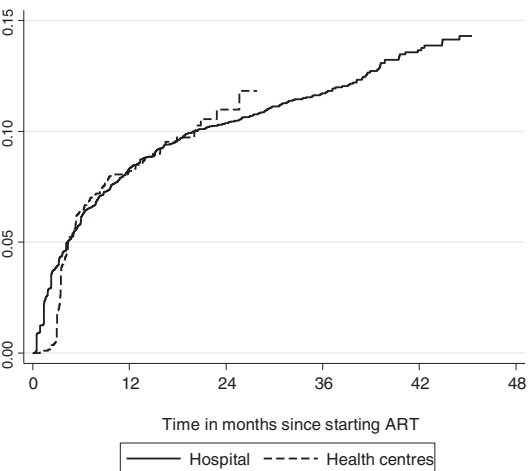

## B Probability of *LFU* while on ART – >12m

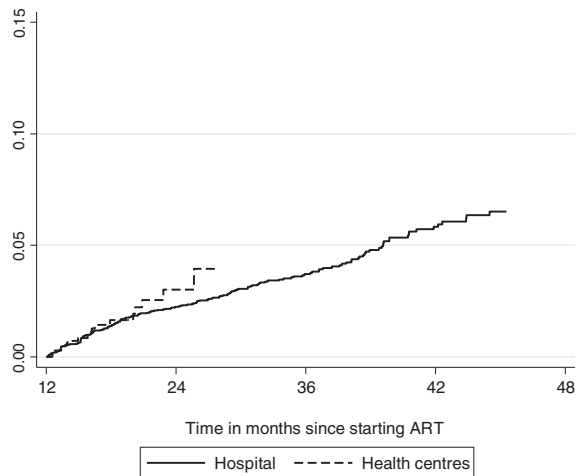

# Buhera - Zimbabwe

## C Probability of *LFU* while on ART – 0m

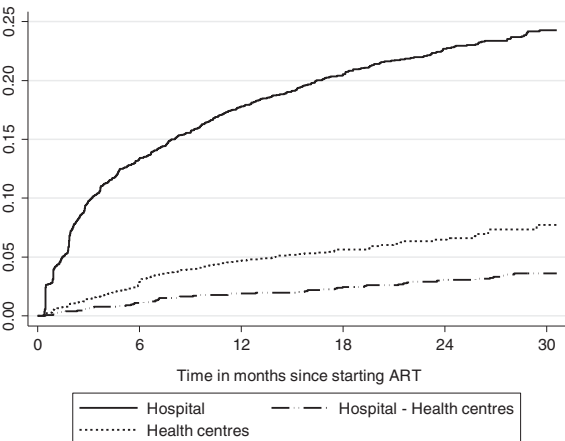

## D Probability of *LFU* while on ART – >12m

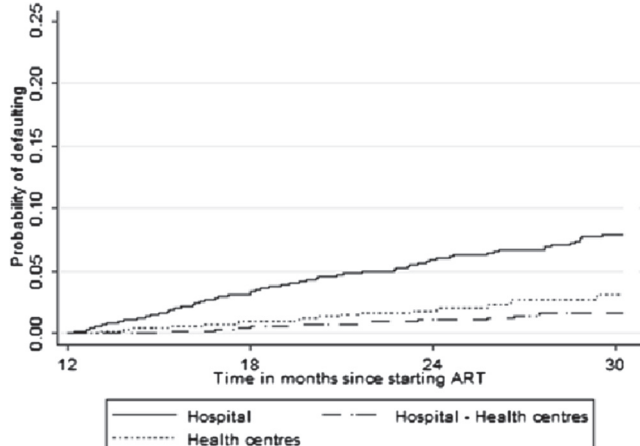

Supplement: MOESM4 [file 9530468]
